## ACKNOWLEDGEMENTS

We are very grateful to Dr R. H. HEDLEY of the British Museum (Natural History) and Dr C. CURDS of the Water Pollution Research Laboratory for identification of ciliates and advice on ciliate biology.

*C. E. Purdom and A. E. Howard*

Fisheries Laboratory, Lowestoft, Suffolk, England

## REFERENCES

- KAHL, A. (1931). Urtiere oder Protozoa. I: Wimpertiere oder Ciliata (Infusoria), eine Bearbeitung der freilebenden und ectocommensalen Infusorien der Erde unter Ausschluss der marinen Tintinnidae. In *Die Tierwelt Deutschlands*, Edited by DAHL, F., 21: (2) 366–67. G. FISCHER, Jena pp 181–398.

## ERRATUM

J. Cons. int. Explor. Mer, 33: (2)

The caption for Figure 3, p. 174, should read:—

Figure 3. Variation in volumes (weighted counts) of diatoms and flagellates in the Menai Straits in 1961 (top), 1962 (middle) and 1963 (bottom). The top line in each plot indicates total phytoplankton volume and the part contributed by flagellates is shown by hatching.
